# Supplementary material
Source: publisher figshare collection journal article supplement (https://tandf.figshare.com/articles/dataset/_/13737588)
Supplement: Supplementary file 1 [file 1]

Supplementary Table 2. Summary of the histopathological deposition scores of ATTR amyloidosis cases.

| No. | LVI | RVI | VE | PVSI | BVSI | LASI | RASI | LASE | RASE | IMV | SVC | RASAN | SAN | AVN | HB | EAT | AANF deposits |
| --- | --- | --- | --- | --- | --- | --- | --- | --- | --- | --- | --- | --- | --- | --- | --- | --- | --- |
| 1 | 2 | 2 | 0 | 2 | 2 | 2 | 2 | 0 | 1 | 1 | 2 | N/A | N/A | 0 | 0 | 1 | + |
| 2 | 2 | 2 | 0 | 3 | 3 | 3 | 3 | 1 | 3 | 1 | 3 | 3 | 1 | 0 | 0 | 1 | + |
| 3 | 2 | 1 | 0 | 2 | 2 | 2 | 3 | 0 | 3 | 0 | 2 | 2 | 1 | 0 | 0 | 1 | + |
| 4 | 2 | 0 | 0 | 1 | 2 | 0 | 0 | 0 | 1 | 2 | 1 | 0 | 1 | 0 | 0 | 0 | + |
| 5 | 2 | 2 | 1 | 2 | 3 | 2 | 3 | 0 | 3 | 2 | 2 | 2 | 1 | 0 | 0 | 1 | + |
| 6 | 3 | 3 | 1 | 3 | 3 | 3 | 3 | 3 | 3 | 1 | 3 | 3 | 2 | 2 | 1 | 1 | + |
| 7 | 2 | 1 | 0 | 2 | 2 | 2 | 2 | 0 | 2 | 0 | 2 | 1 | 1 | 0 | 0 | 0 | + |
| 8 | 2 | 2 | 0 | 2 | 2 | 2 | 3 | 1 | 3 | 1 | 3 | 2 | 1 | 0 | 0 | 1 | + |
| 9 | 2 | 1 | 0 | 2 | 2 | 1 | 1 | 0 | 1 | 1 | 2 | 0 | 0 | 0 | 0 | 0 | + |
| 10 | 2 | 2 | 0 | 2 | 3 | 2 | 3 | 1 | 3 | 1 | 3 | 1 | 0 | 0 | 0 | 1 | + |
| 11 | 1 | 0 | 0 | 1 | 2 | 1 | 1 | 2 | 2 | 1 | 1 | 0 | 0 | 0 | 0 | 0 | + |
| 12 | 3 | 3 | 1 | 3 | 3 | 3 | 3 | 1 | 3 | 1 | 3 | 3 | 1 | 1 | 1 | 1 | + |
| 13 | 1 | 2 | 0 | 1 | 1 | 2 | 2 | 1 | 3 | 1 | 2 | 1 | 0 | 0 | 0 | 1 | + |
| 14 | 2 | 2 | 0 | 2 | 2 | 2 | 2 | 2 | 3 | 1 | 2 | N/A | N/A | 0 | 0 | 0 | + |
| 15 | 0 | 0 | 0 | 0 | 0 | 0 | 0 | 0 | 0 | 2 | 0 | N/A | N/A | 0 | 0 | 0 | + |
| 16 | 2 | 2 | 0 | 2 | 2 | 2 | 2 | 1 | 3 | 1 | 2 | 2 | 0 | 0 | 0 | 0 | + |
| 17 | 3 | 3 | 1 | 3 | 3 | 3 | 3 | 0 | 2 | 1 | 2 | 3 | 1 | 1 | 1 | 1 | + |
| 18 | 1 | 0 | 0 | 1 | 1 | 1 | 0 | 0 | 0 | 0 | 0 | 0 | 0 | 0 | 0 | 0 | - |
| 19 | 2 | 2 | 1 | 2 | 3 | 2 | 3 | 1 | 2 | 2 | 2 | 1 | 1 | 1 | 0 | 1 | + |
| 20 | 1 | 0 | 0 | 0 | 1 | 2 | 1 | 0 | 1 | 0 | 1 | 1 | 0 | 0 | 0 | 0 | + |
| 21 | 3 | 3 | 1 | 2 | 3 | 3 | 3 | 2 | 3 | 2 | 3 | 3 | 2 | 1 | 1 | 1 | + |
| 22 | 2 | 1 | 1 | 2 | 2 | 1 | 0 | 0 | 0 | 0 | 0 | 0 | 0 | 0 | 0 | 0 | + |
| 23 | 2 | 2 | 1 | 2 | 2 | 3 | 2 | 0 | 3 | 1 | 3 | 3 | 1 | 0 | 0 | 1 | + |
| 24 | 2 | 2 | 0 | 2 | 2 | 2 | 2 | 0 | 3 | 1 | 3 | 2 | 1 | 0 | 0 | 1 | + |
| 25 | 1 | 1 | 0 | 1 | 1 | 2 | 2 | 0 | 0 | 1 | 1 | 0 | 0 | 0 | 0 | 0 | + |
| 26 | 3 | 2 | 1 | 2 | 3 | 2 | 2 | 1 | 2 | 1 | 3 | 3 | 1 | 0 | 0 | 1 | + |
| 27 | 2 | 2 | 0 | 2 | 3 | 3 | 3 | 1 | 3 | 1 | 3 | 3 | 1 | 0 | 0 | 1 | + |
| 28 | 2 | 2 | 0 | 2 | 2 | 2 | 1 | 0 | 0 | 2 | 2 | 2 | 1 | 0 | 0 | 1 | + |
| 29 | 1 | 1 | 0 | 1 | 2 | 0 | 1 | 0 | 0 | 2 | 2 | 0 | 0 | 0 | 0 | 0 | + |
| 30 | 2 | 1 | 0 | 2 | 2 | 1 | 2 | 2 | 2 | 0 | 2 | 1 | 0 | 0 | 0 | 0 | + |
| 31 | 3 | 3 | 1 | 3 | 3 | 2 | 2 | 0 | 3 | 1 | 3 | 1 | 1 | 1 | 1 | 1 | + |
| 32 | 1 | 1 | 0 | 1 | 2 | 2 | 2 | 0 | 2 | 1 | 1 | 1 | 0 | 0 | 0 | 1 | + |
| 33 | 2 | 1 | 0 | 2 | 2 | 2 | 1 | 2 | 2 | 2 | 1 | 2 | 0 | 0 | 0 | 0 | + |
| 34 | 2 | 2 | 0 | 2 | 2 | 2 | 2 | 0 | 3 | 1 | 3 | 1 | 0 | 0 | 0 | 0 | + |
| 35 | 2 | 2 | 0 | 2 | 2 | 2 | 2 | 0 | 2 | 0 | 2 | 2 | 0 | 0 | 0 | 0 | + |
| 36 | 2 | 2 | 1 | 2 | 2 | 2 | 2 | 0 | 3 | 1 | 3 | 2 | 1 | 0 | 0 | 1 | + |
| 37 | 2 | 2 | 1 | 2 | 2 | 2 | 2 | 0 | 2 | 0 | 2 | 2 | 1 | 0 | 0 | 0 | + |
| 38 | 2 | 2 | 1 | 2 | 3 | 2 | 2 | 0 | 3 | 1 | 2 | 3 | 2 | 0 | 0 | 1 | + |
| 39 | 0 | 0 | 0 | 0 | 1 | 3 | 3 | 1 | 3 | 2 | 3 | 2 | 0 | 0 | 0 | 0 | + |
| 40 | 1 | 2 | 0 | 1 | 2 | 2 | 2 | 2 | 3 | 0 | 2 | 1 | 0 | 0 | 0 | 0 | + |
| 41 | 1 | 0 | 0 | 1 | 1 | 0 | 2 | 0 | 1 | 0 | 0 | 1 | 0 | 0 | 0 | 0 | + |
| 42 | 1 | 0 | 0 | 1 | 2 | 1 | 2 | 0 | 3 | 1 | 3 | 1 | 0 | 0 | 0 | 0 | + |
| 43 | 1 | 0 | 0 | 1 | 1 | 1 | 1 | 0 | 1 | 0 | 0 | 0 | 0 | 0 | 0 | 0 | + |
| 44 | 1 | 0 | 0 | 1 | 2 | 0 | 0 | 0 | 0 | 0 | 0 | 0 | 0 | 0 | 0 | 0 | + |

Abbreviations: AANF, amyloid atrial natriuretic factor; AVN, atrioventricular node; UVSI, basilar ventricular septal interstitium; EAT, epicardial adipose tissue; HB, bundle of His; IMV, intramural vessel; LASE, left-side atrial septum endocardium; LASI, left-side atrial septum interstitium; LVI, left ventricle interstitium; LVT, left ventricular thickness; N/A, not available, PVSI, papillary muscle-level ventricular septal interstitium; RASAN, peri-sinoatrial node right atrium; RASE, right-side atrial septum endocardium; RASI, right-side atrial septum interstitium; RVI, right ventricle interstitium; SVC, superior vena cava
